# Supplementary material for: Decreased lymphatic HIF-2α accentuates lymphatic remodeling in lymphedema
Source: JCI journal article supplement (doi:10.1172/jci136164), 2020-07-16
Supplement: sd1 [file 1]

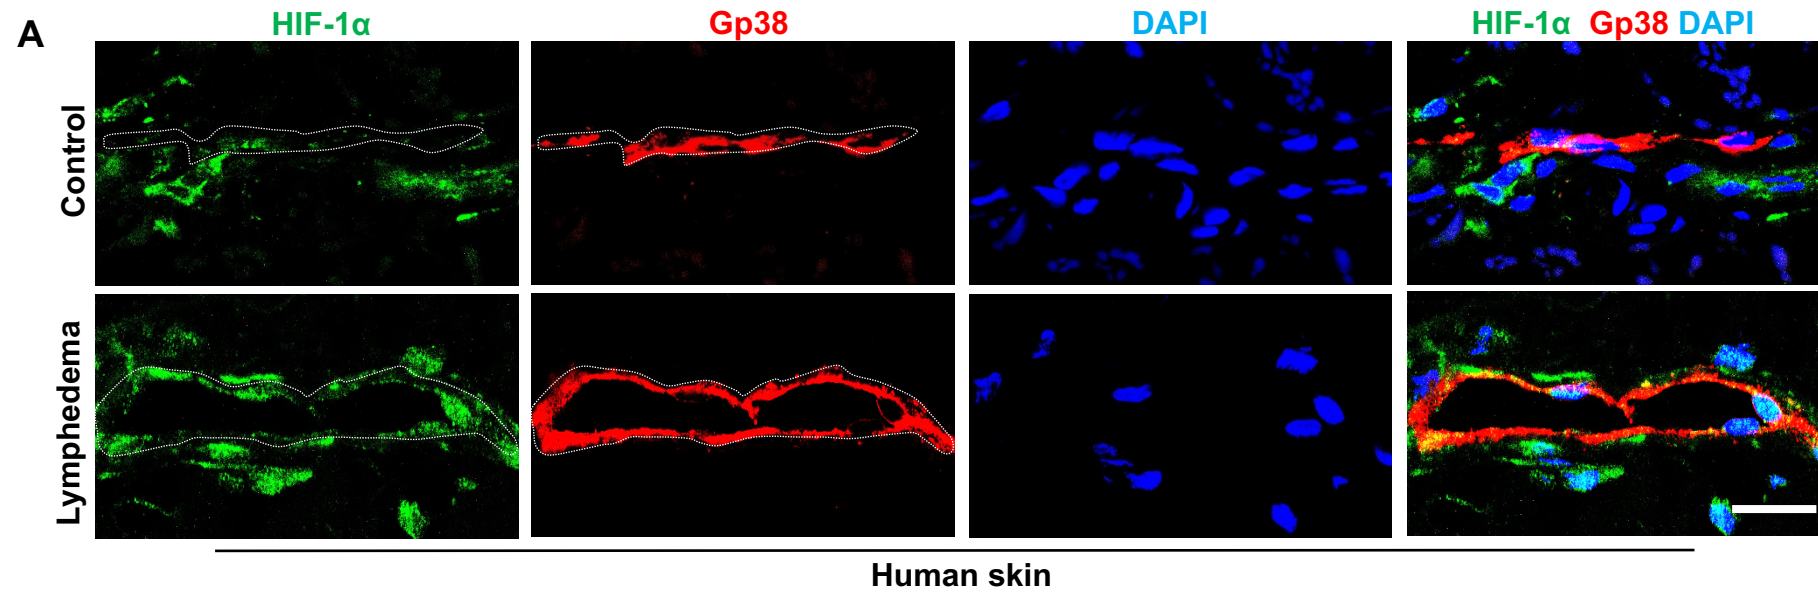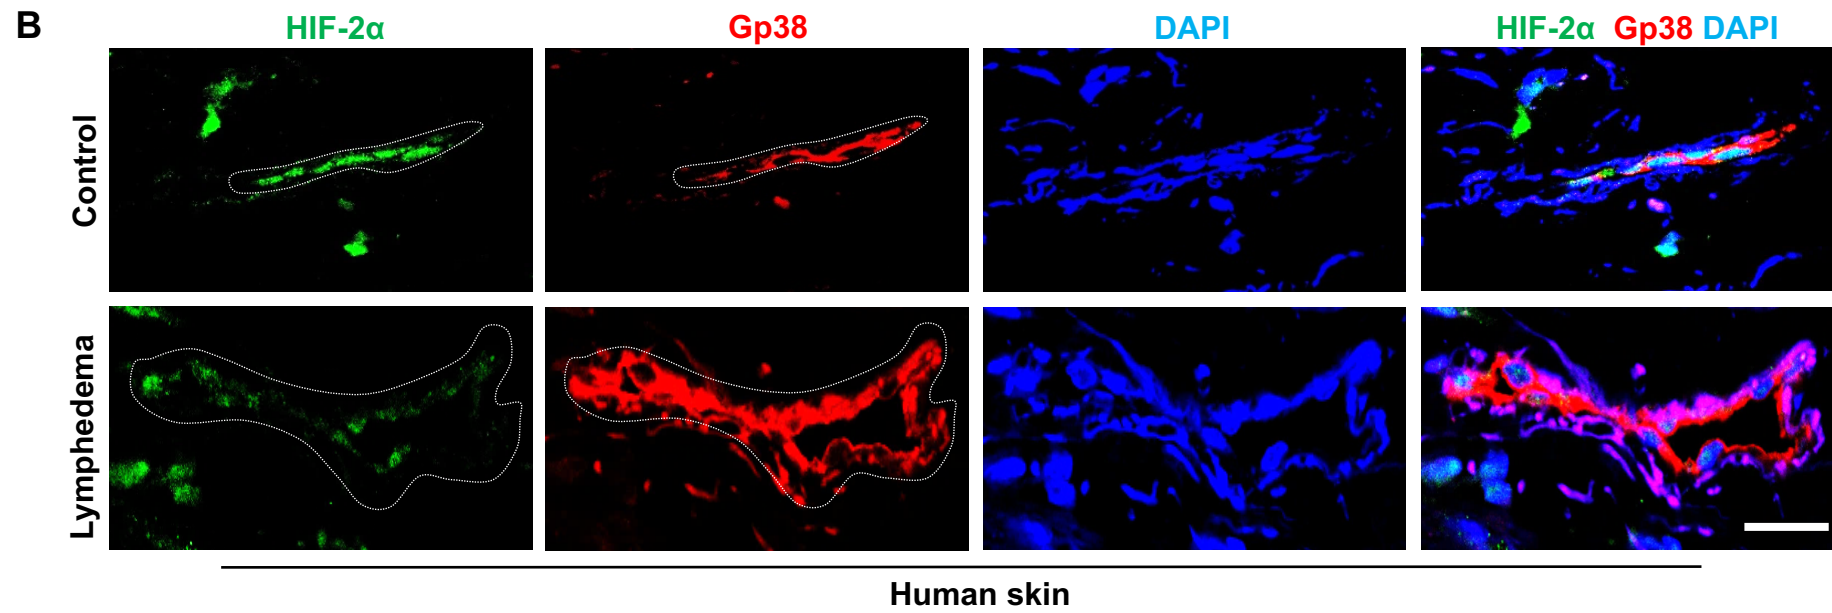

# Supplemental Figure 2

## Lymphedematous tissue is hypoxic

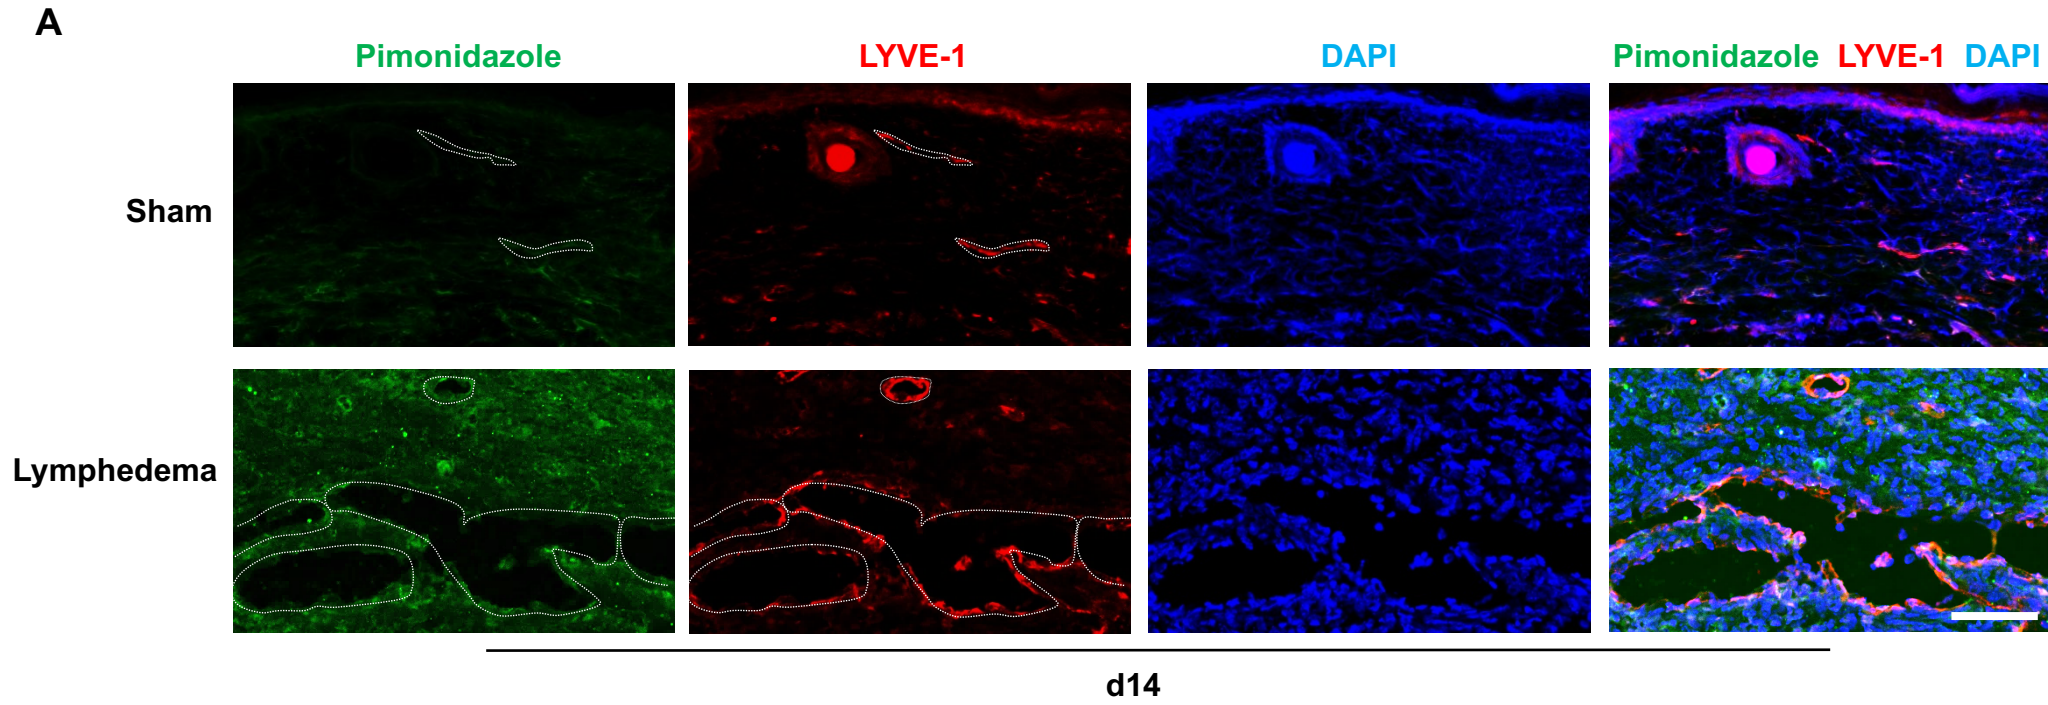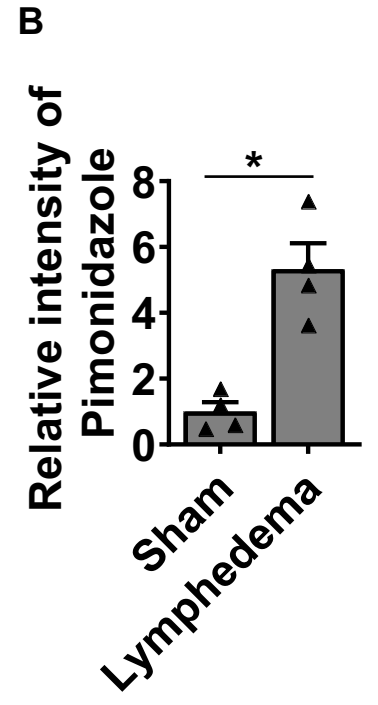

# Supplemental Figure 3

## Lymphatic specific reporter or *Hif* knockout or overexpression mice and the timeline for lymphedema study

**A**

| Symbol             | Genotype                            | Purpose                                  |
|--------------------|-------------------------------------|------------------------------------------|
| Lymphatic reporter | <i>Prox-1-CreERT2, LSLtdTomato</i>  | LEC specific tdTomato expression         |
| <i>Hif2α</i> LECKO | <i>Prox-1-CreERT2, Hif2α(fl/fl)</i> | LEC specific <i>Hif2α</i> knockout       |
| <i>Hif2α</i> LECO  | <i>Prox-1-CreERT2, LSLHif2α</i>     | LEC specific <i>Hif2α</i> overexpression |
| <i>Hif1α</i> LECKO | <i>Prox-1-CreERT2, Hif1α(fl/fl)</i> | LEC specific <i>Hif1α</i> knockout       |

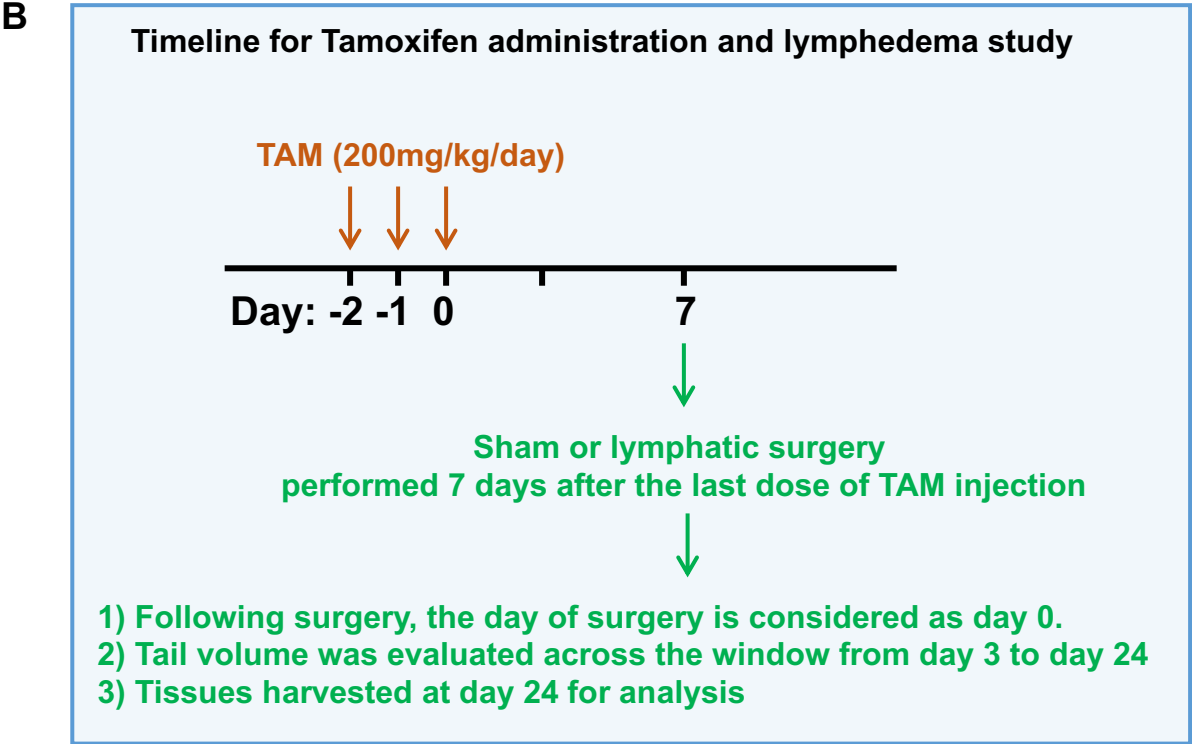

# Supplemental Figure 4

No observable spontaneous, tamoxifen-independent, CreERT2-mediated tdTomato induction

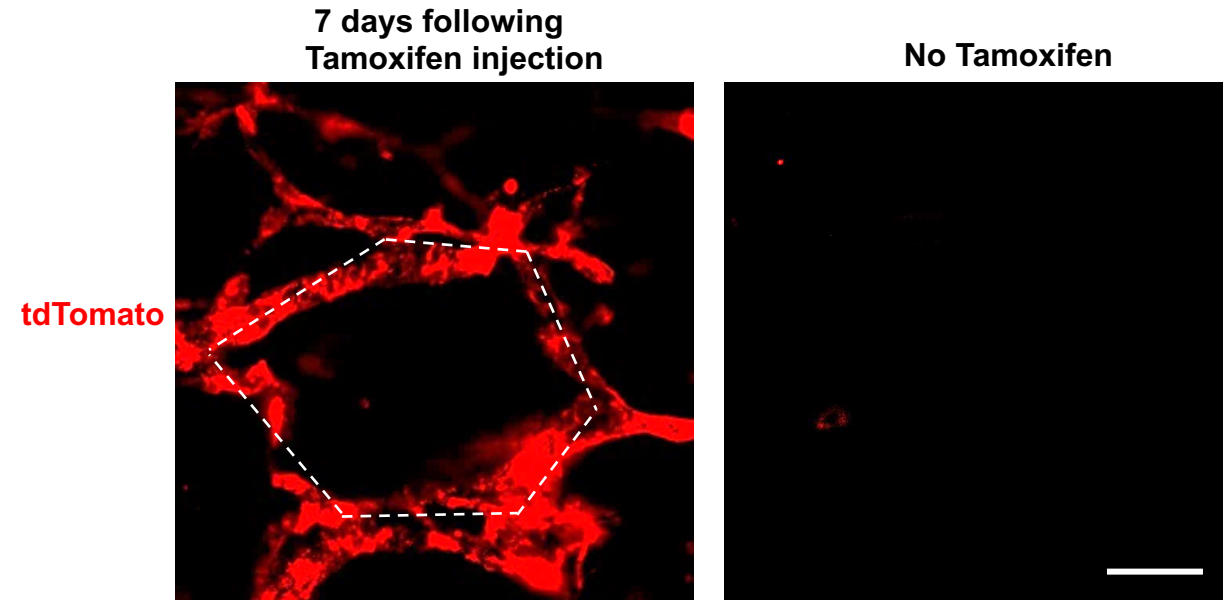

Prox-1-CreERT2 efficiently mediates LEC *Hif2α* knockout or overexpression

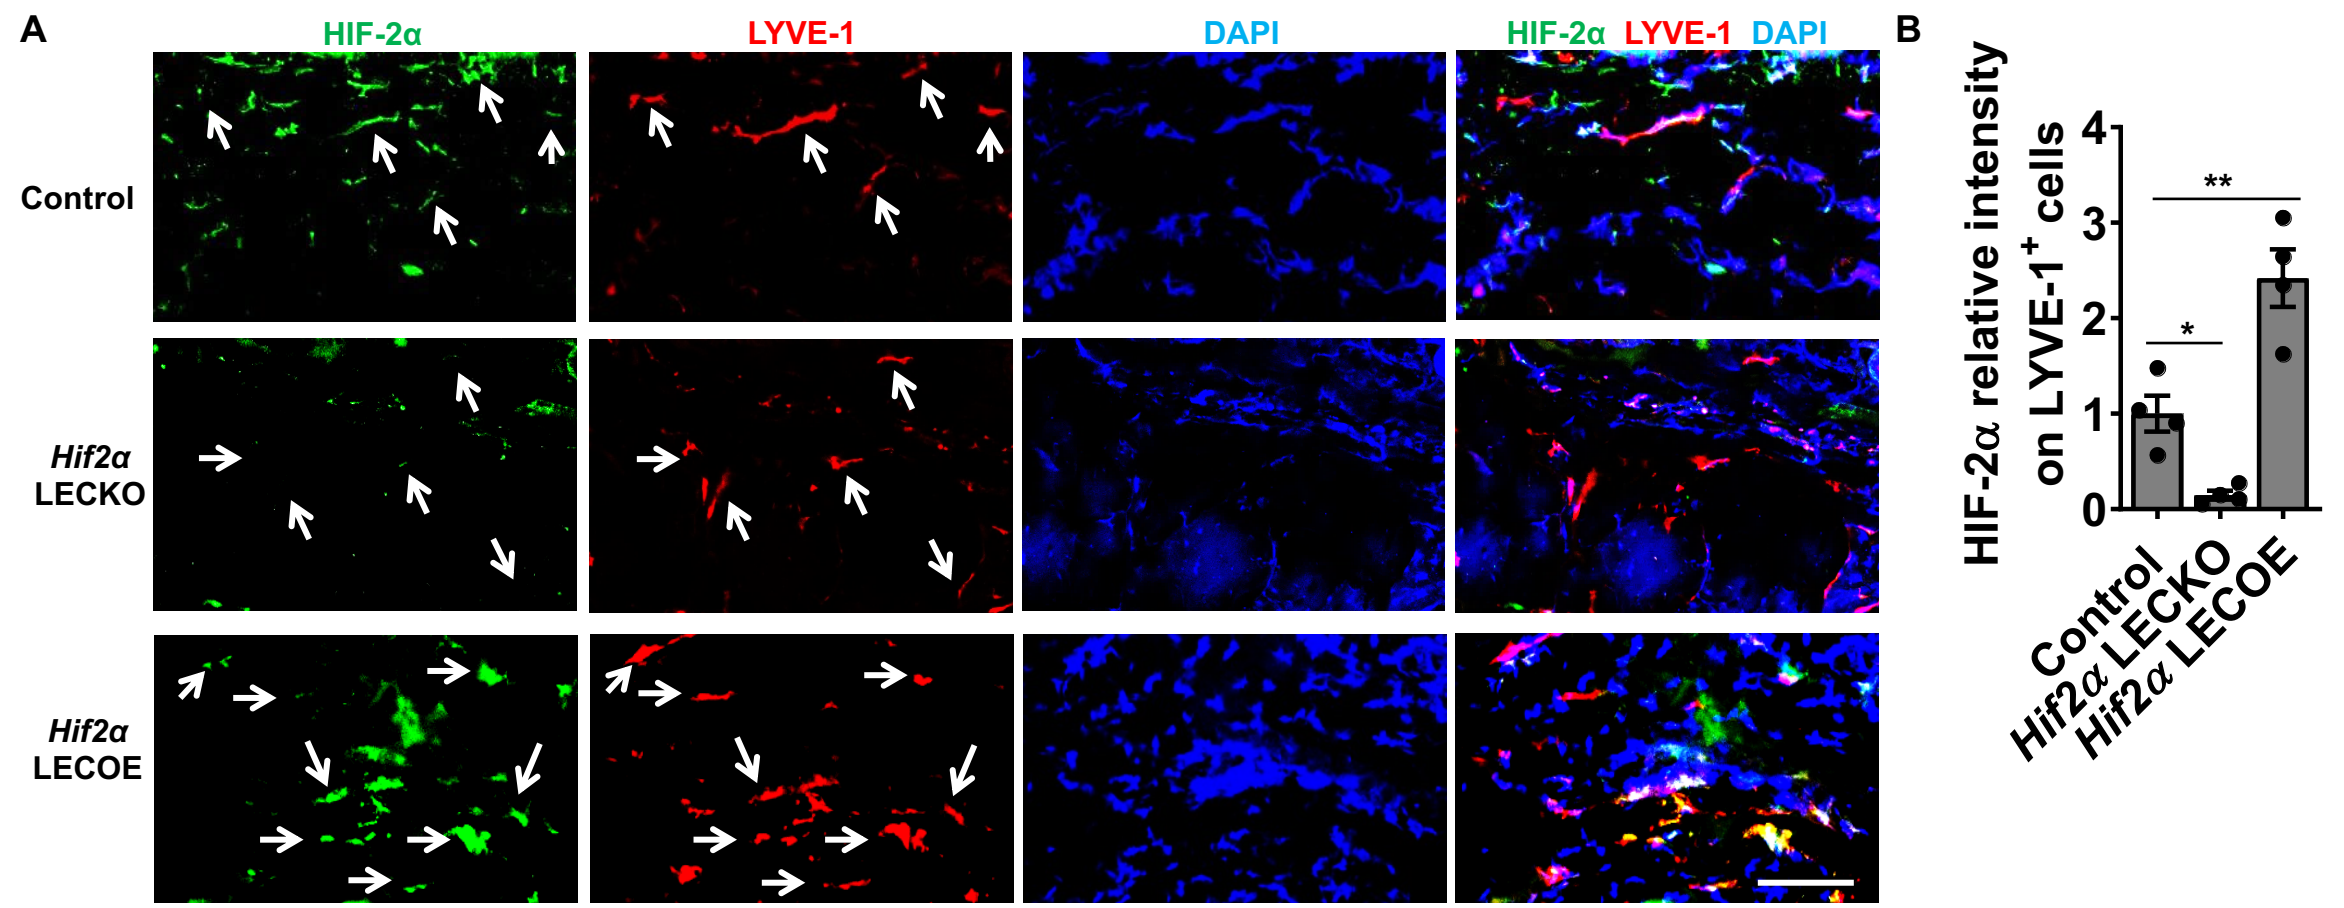

# Supplemental Figure 6

## Prox-1-CreERT2 efficiently mediates LEC *Hif1α* knockout

A

HIF-1 $\alpha$

LYVE-1

DAPI

HIF-1 $\alpha$  LYVE-1 DAPI

Control

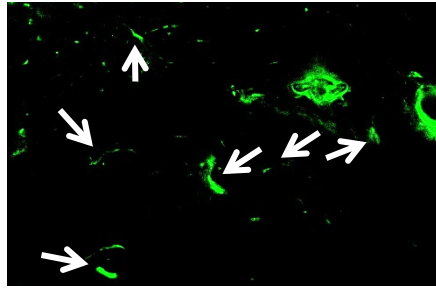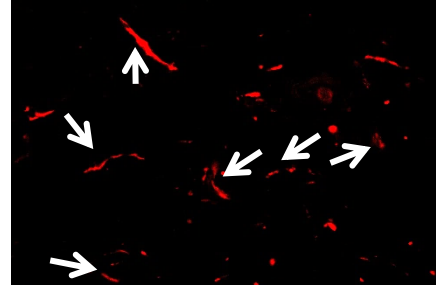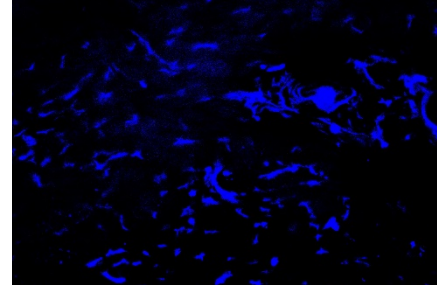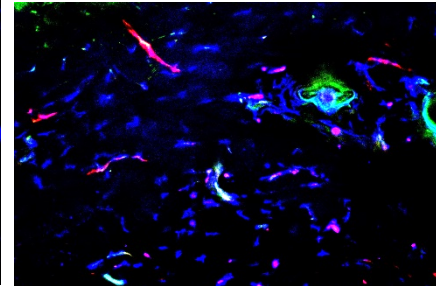

*Hif1α*  
LECKO

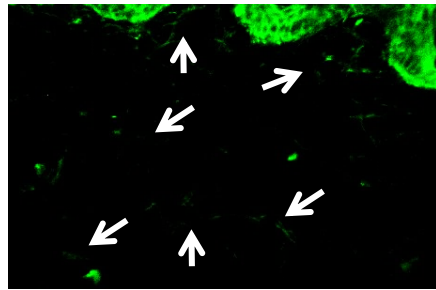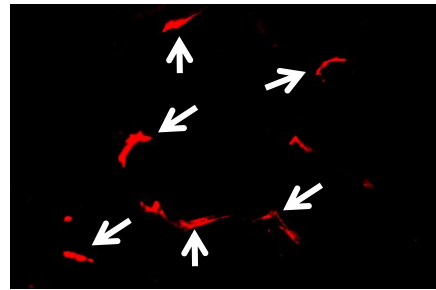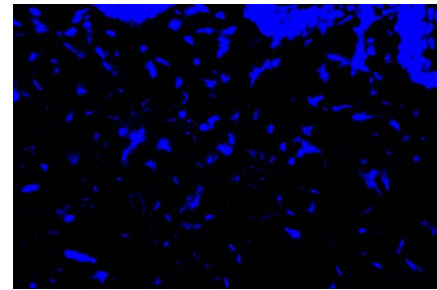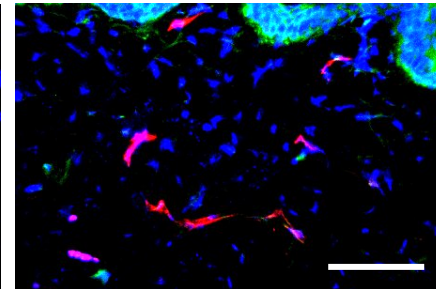

B

HIF-1 $\alpha$  relative intensity  
on LYVE-1<sup>+</sup> cells

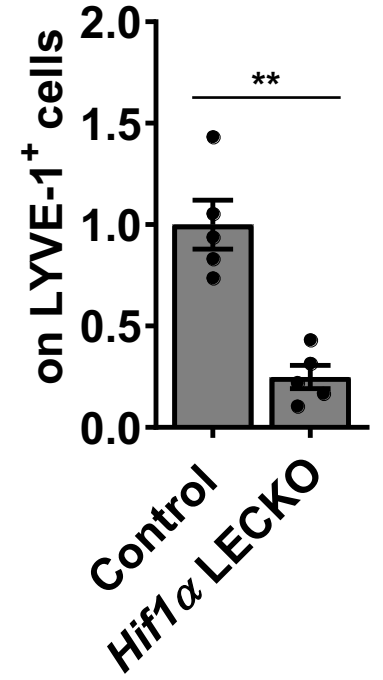

# Supplemental Figure 7

## Low LEC HIF-1 $\alpha$ expression in lymphedematous skin of *Hif1 $\alpha$* LECKO mice

A

HIF-1 $\alpha$

LYVE-1

DAPI

HIF-1 $\alpha$  LYVE-1 DAPI

Control

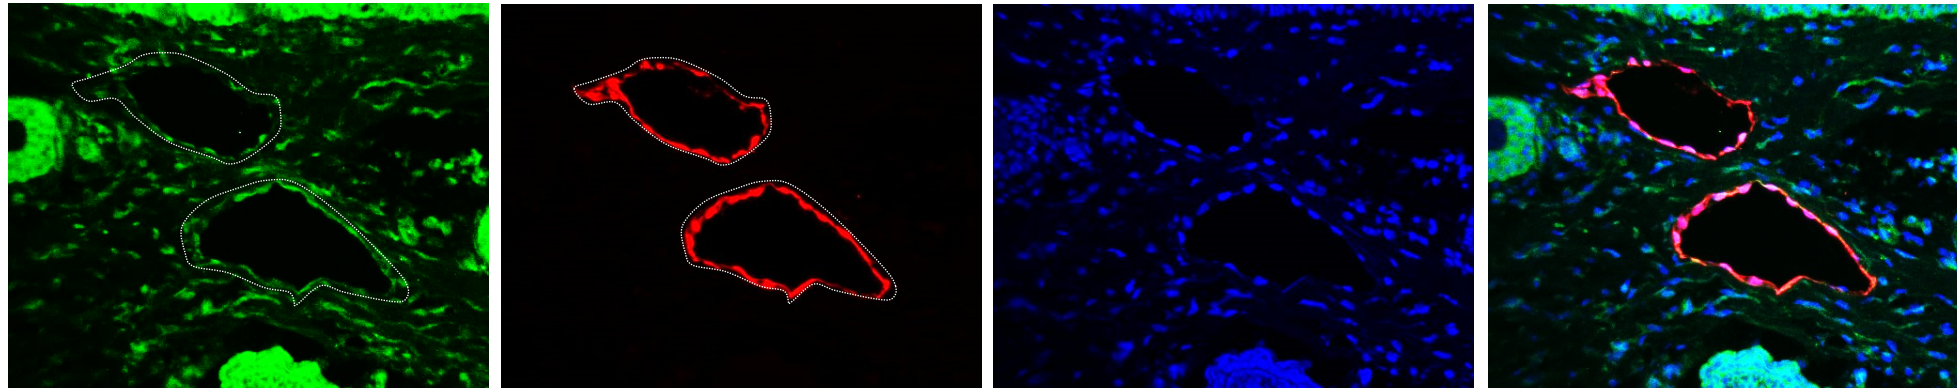

*Hif1 $\alpha$*  LECKO

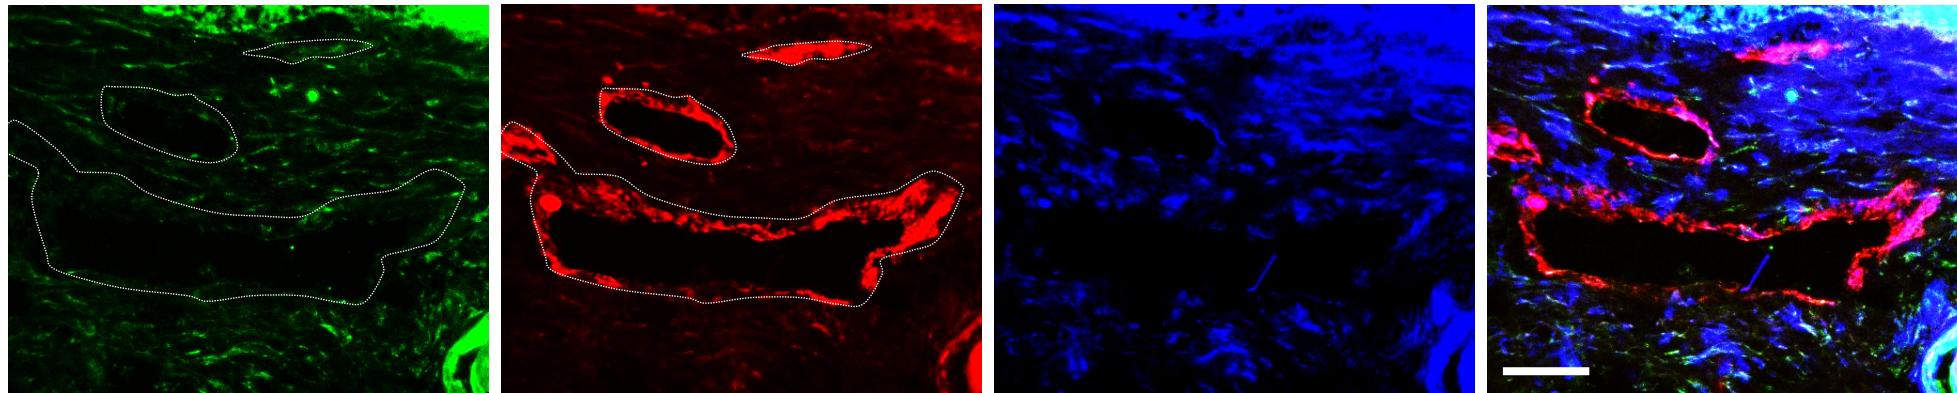

Lymphedema (d24)

B

- Control
- ▼ *Hif1 $\alpha$*  LECKO

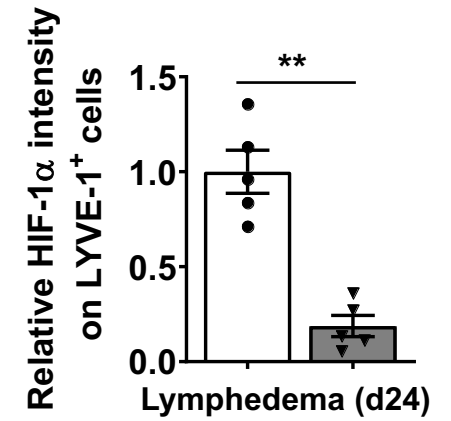

# Supplemental Figure 8

LEC *Hif1 $\alpha$*  deletion causes an increased but non-sustained rise in mouse tail volume

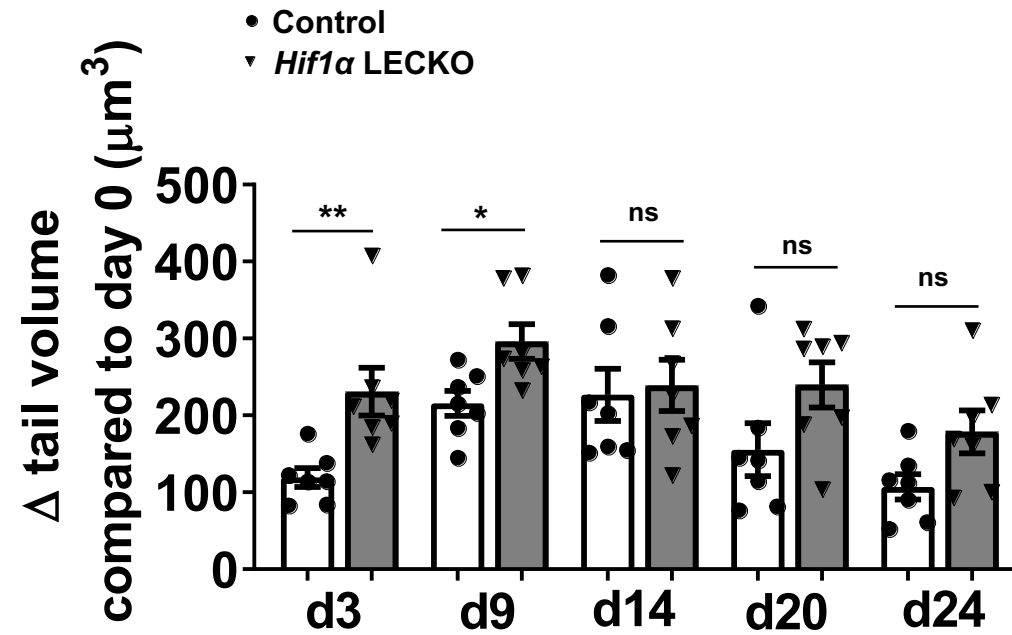



# Supplemental Figure 9

## Lymphatic *Hif2α* deletion leads to a decreased VE-Cadherin expression in LECs

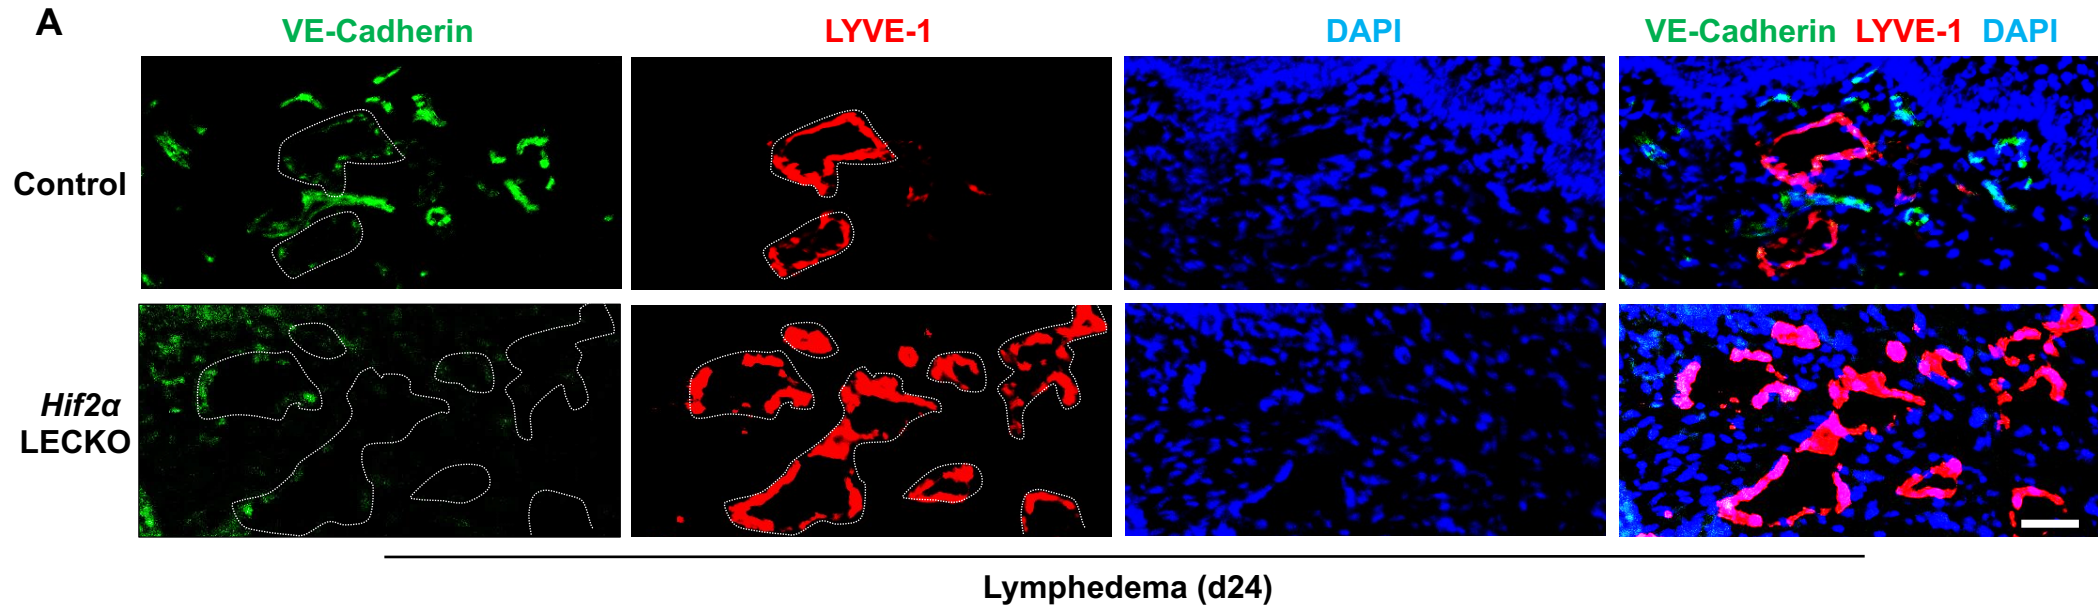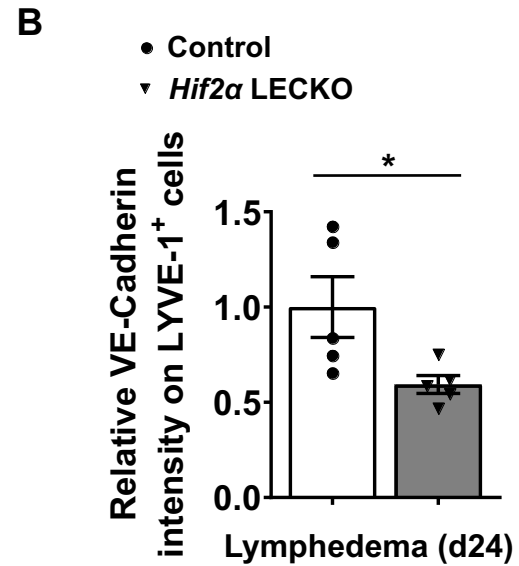

# Supplemental Figure 10

## Myeloid cell *Hif2α* knockout caused transient worsening of tail swelling

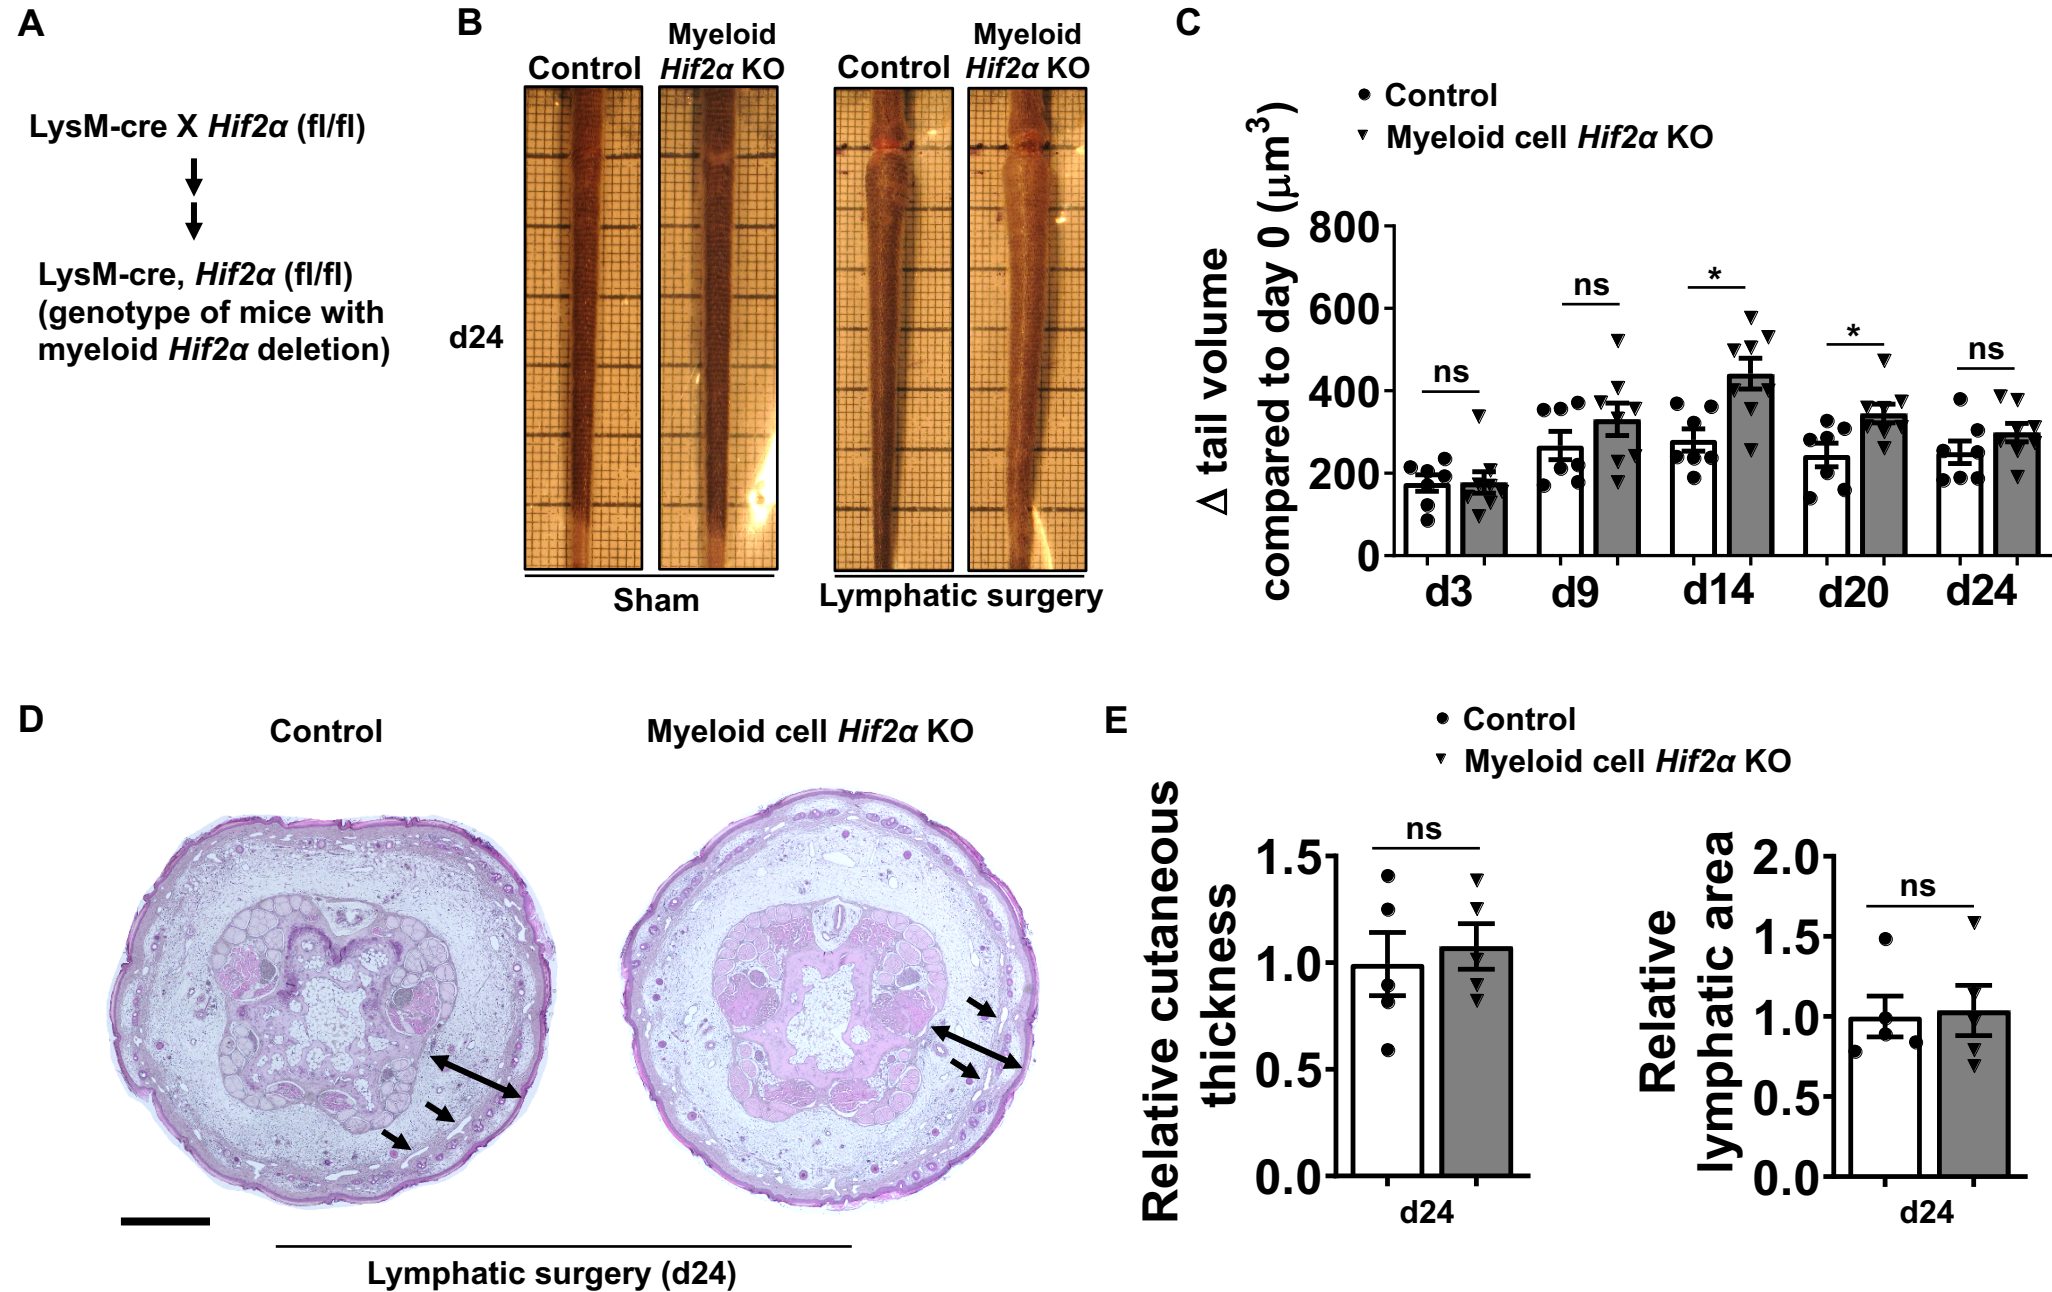

## Prox-1-CreERT2 efficiently mediates LEC *Hif2α* knockout in embryo dorsal skin

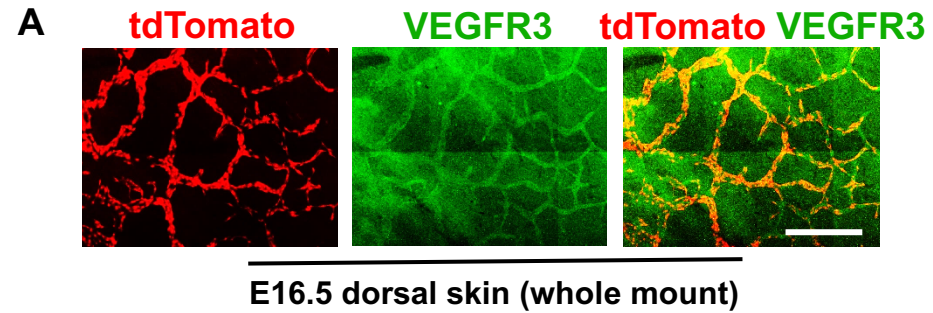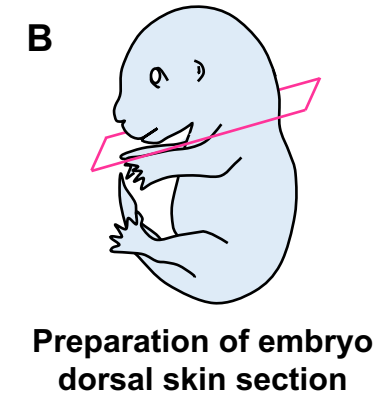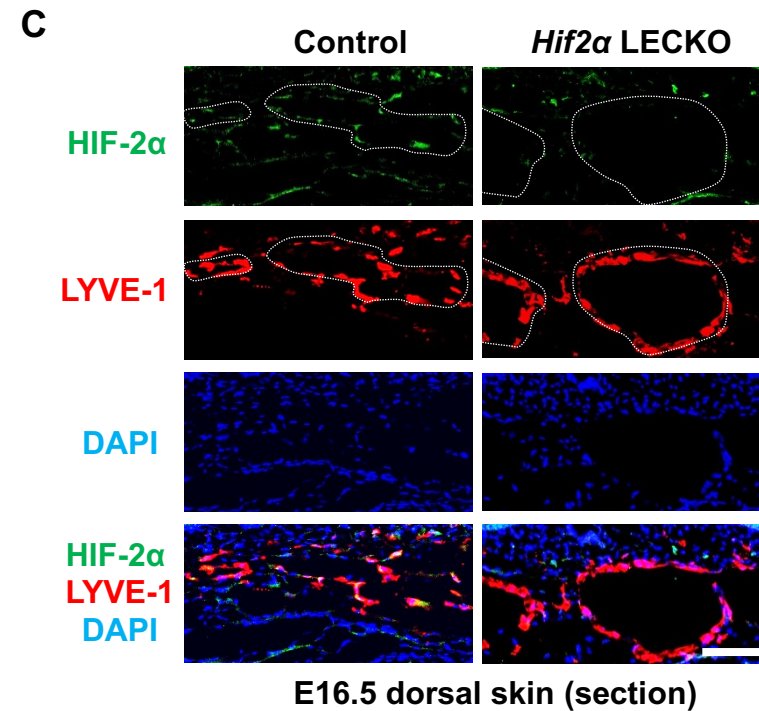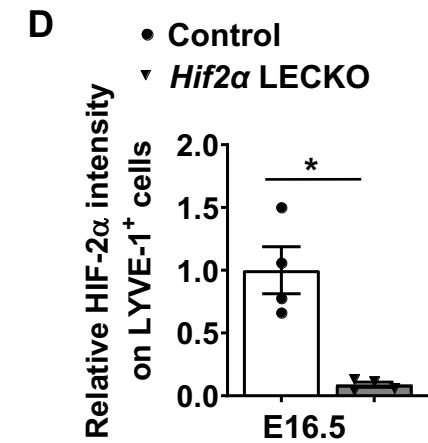

# Supplemental Figure 12

## LEC *Hif2α* knockout causes abnormal tail and tracheal lymphatic remodeling

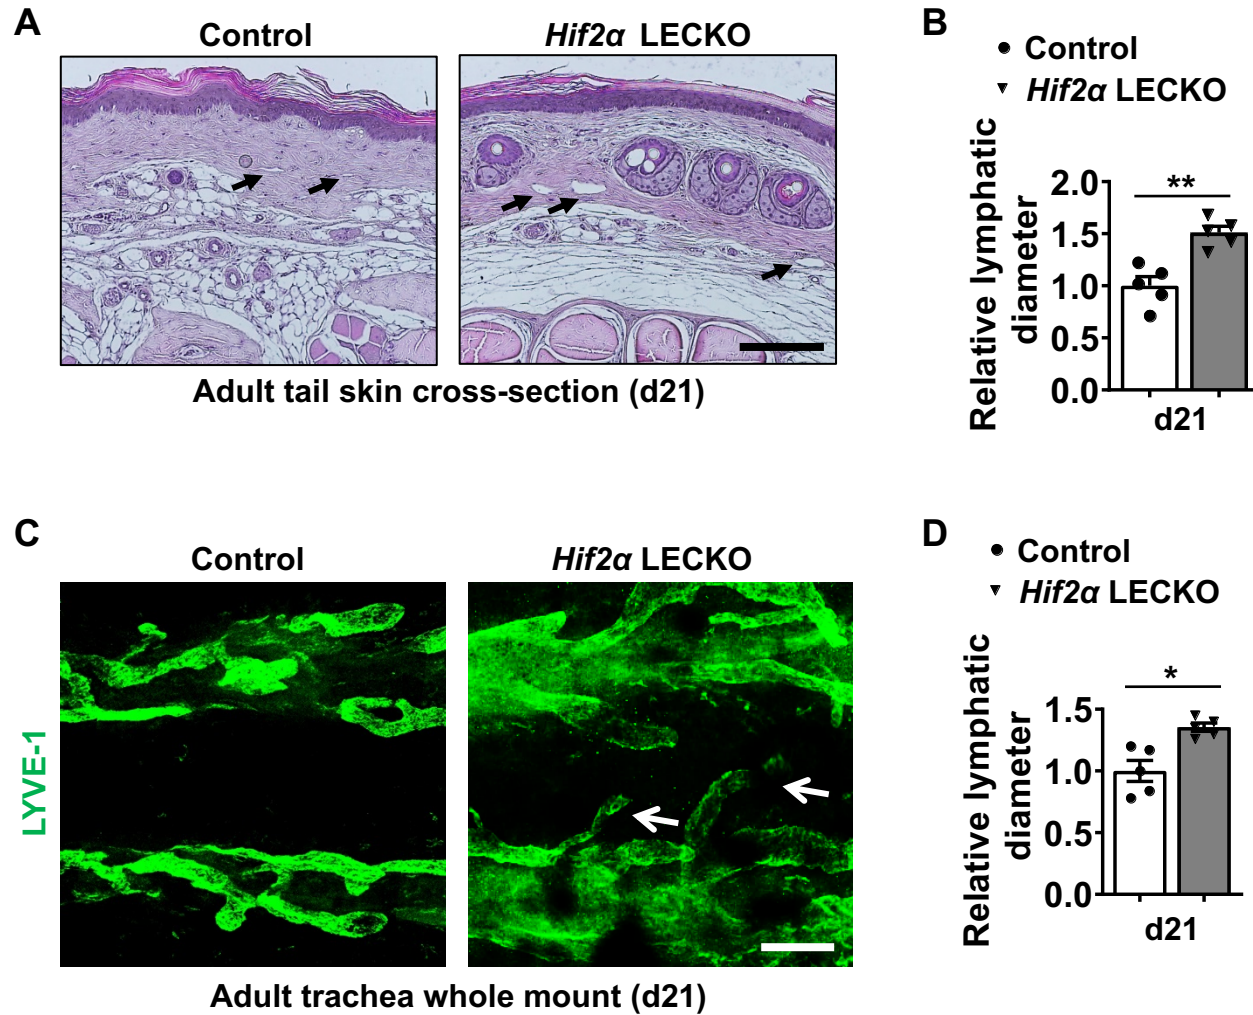

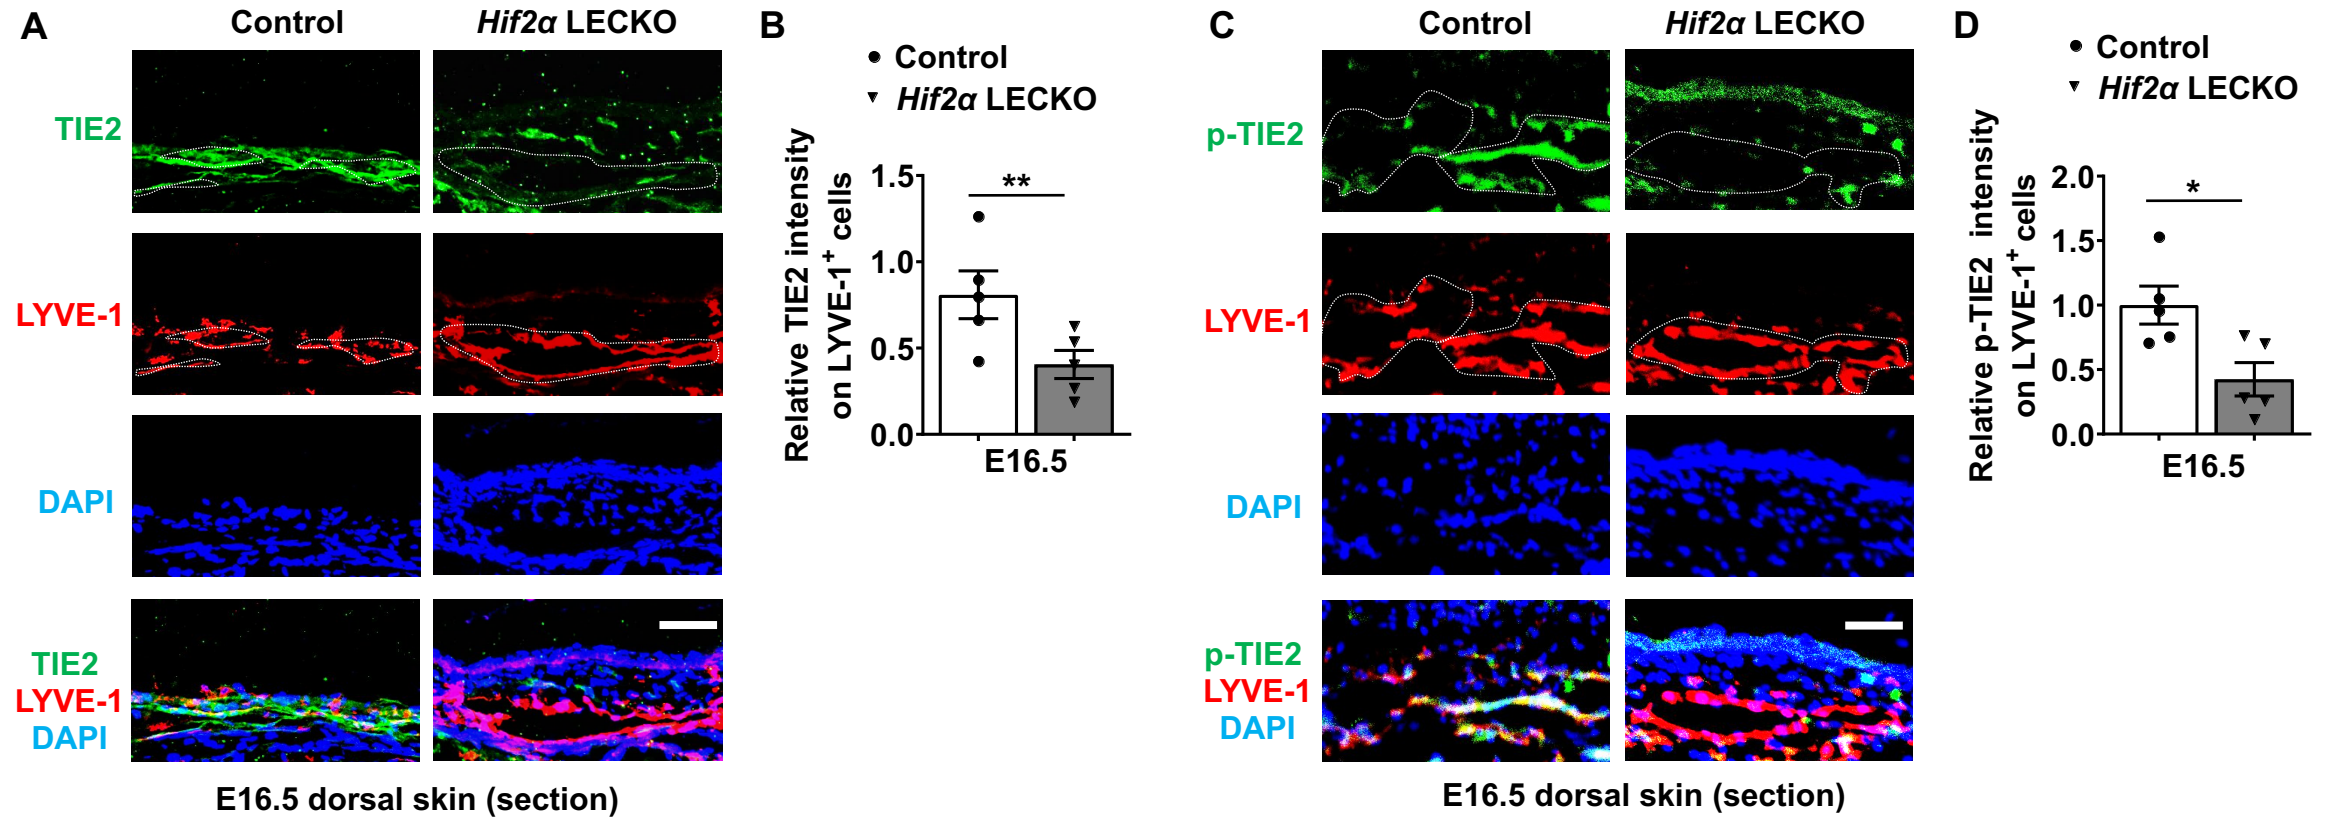

# Supplemental Figure 14

**AdAngpt1, but not AdAngpt2, treatment attenuates tail swelling in WT mice subject to lymphatic surgery**

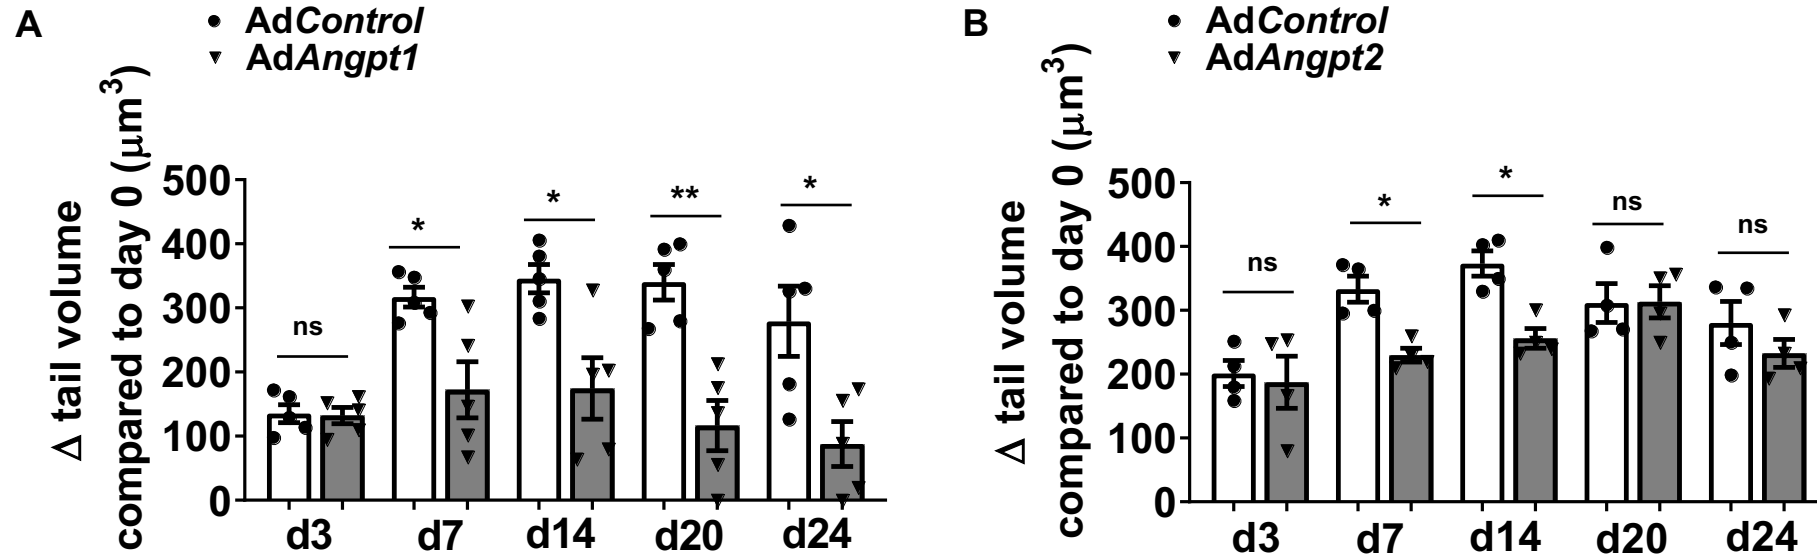

Sustained LEC HIF-2 $\alpha$  expression in lymphedematous skin of *Hif2 $\alpha$*  LECO mice

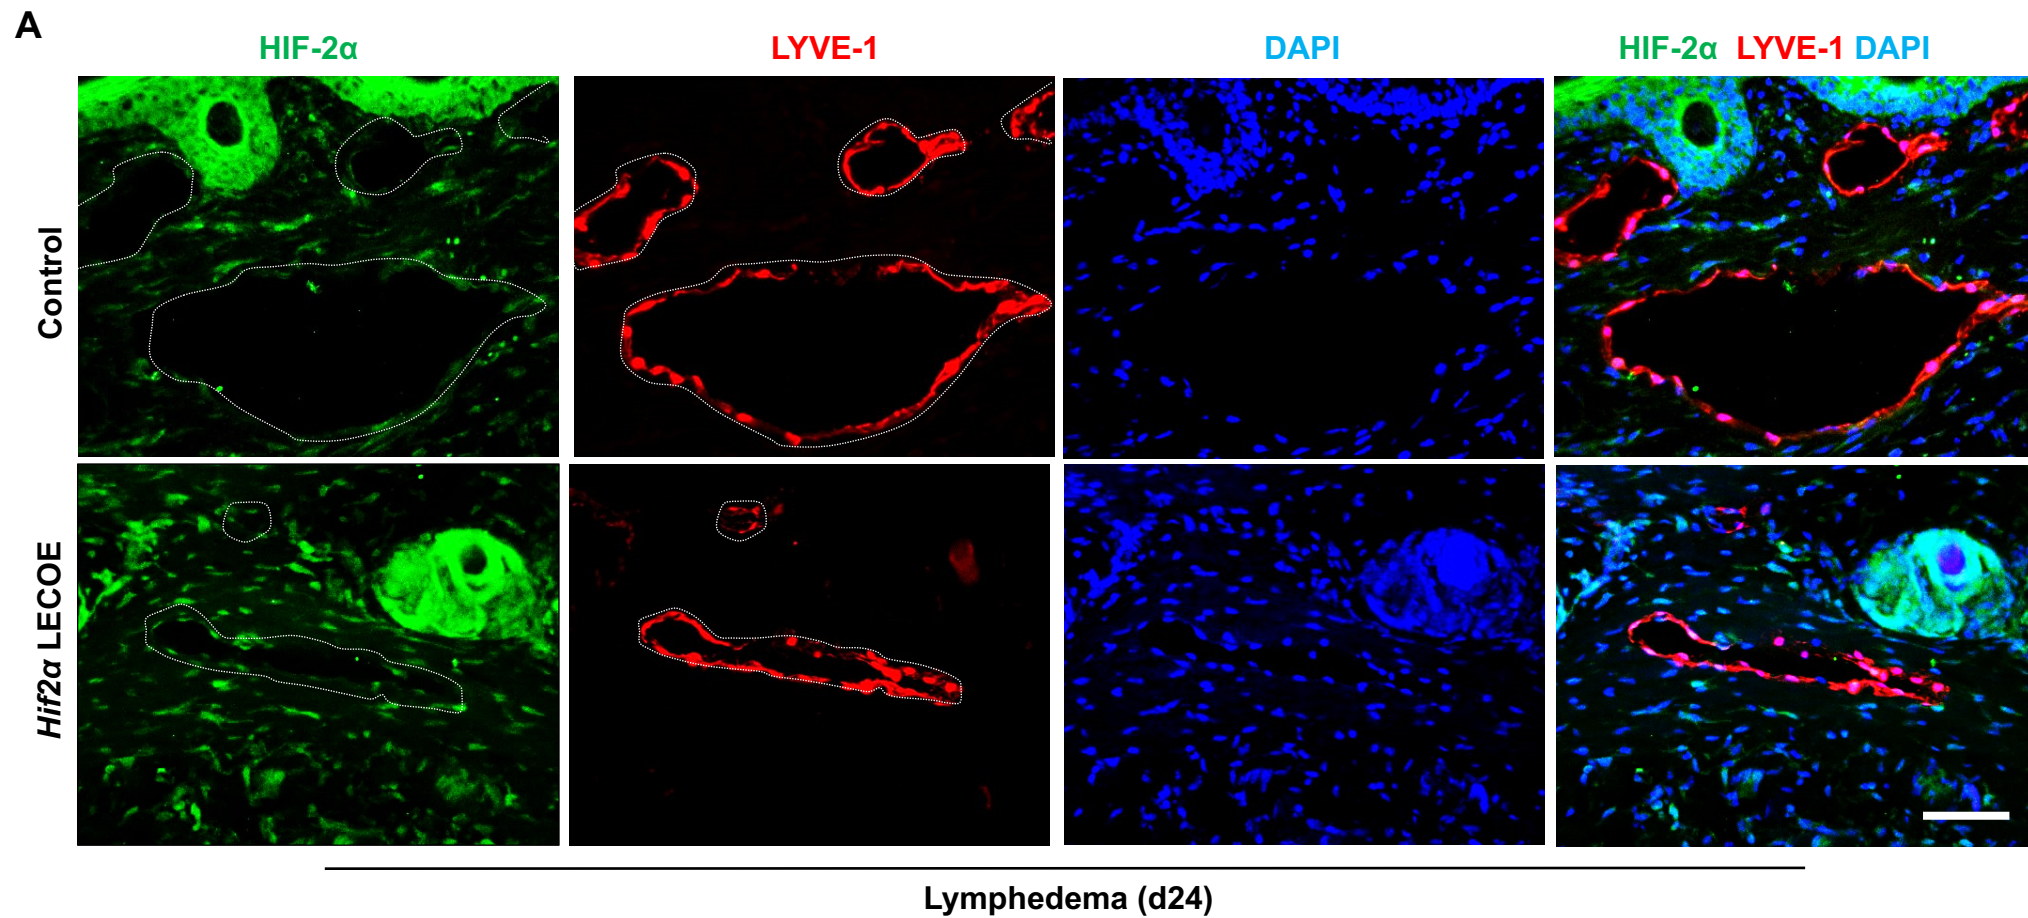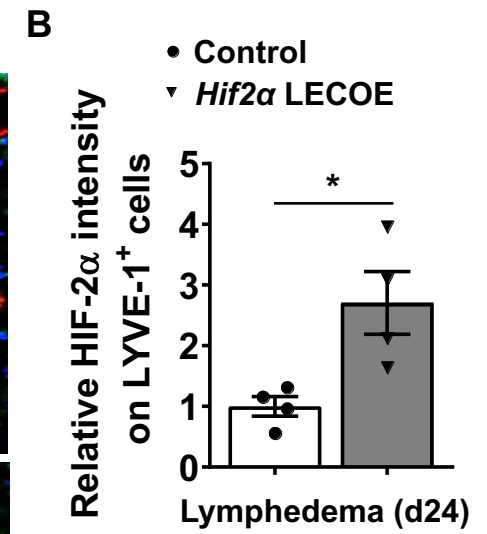

# Supplemental Figure 16

LEC *Hif2α* overexpression reduces tissue CD45<sup>+</sup> cell numbers following lymphatic surgery

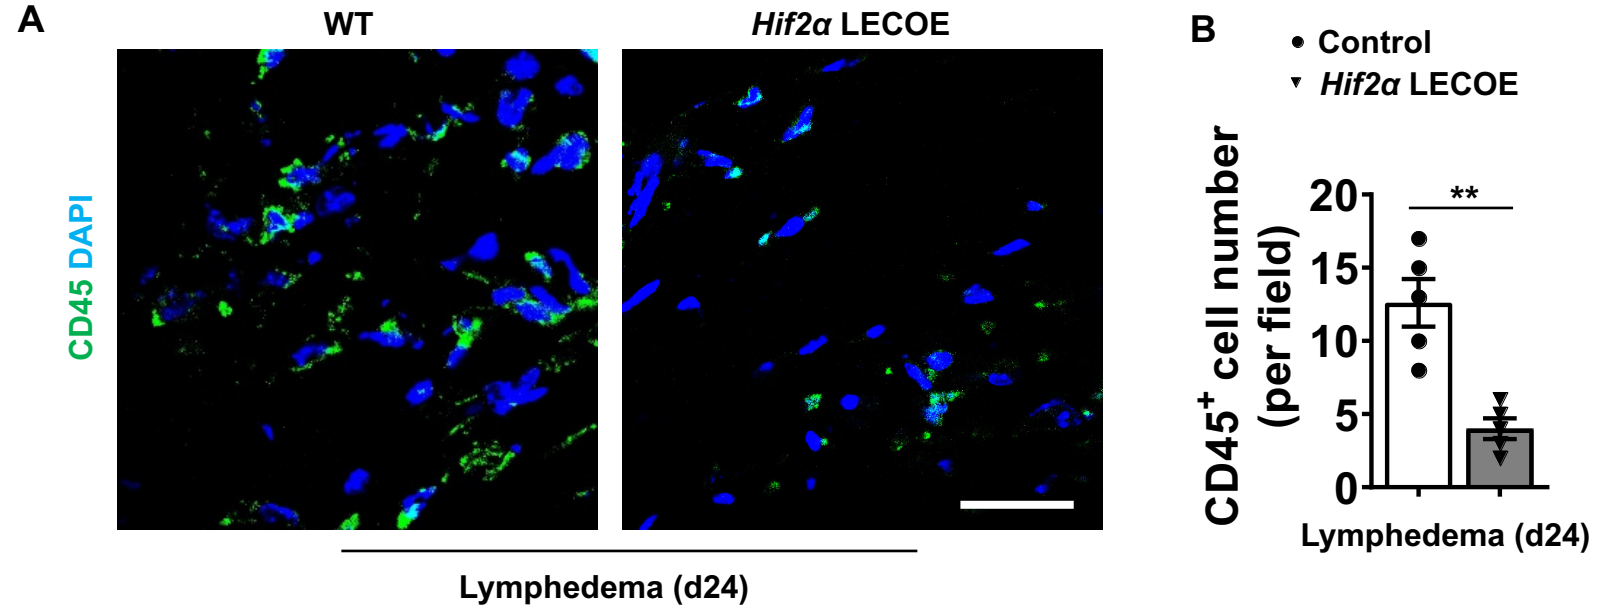



**Supplemental Figure 1. High magnification images supplements Figure 1. (A)**

Immunofluorescence staining of HIF-1 $\alpha$  (green) and Gp38 (red) in control and lymphedematous clinical samples. DAPI (blue) stains the nucleus. White dashed lines demarcate lymphatics. **(B)** Immunofluorescence staining of HIF-2 $\alpha$  (green) and Gp38 (red) of human samples. DAPI (blue) stains the nucleus. White dashed lines demarcate lymphatics. Scale bars: 30  $\mu$ m **(A and B)**.

**Supplemental Figure 2. Lymphedematous tissue is hypoxic. (A)** Hypoxyprobe

(pimonidazole) staining. Representative immunofluorescence staining images of LYVE-1 (red) and pimonidazole (green) of tails of mice subjected to sham or lymphatic surgery (d14). White dashed lines demarcate the lymphatics. DAPI (blue) stains the nucleus. **(B)** Quantification of pimonidazole intensity comparing the groups shown in **A** (n=4); data are presented as mean  $\pm$  SEM; \*P<0.05 by the Mann-Whitney test. n represents numbers of mice. Scale bar: 60  $\mu$ m **(A)**.

**Supplemental Figure 3. Lymphatic-specific transgenic mice and experimental timeline.**

**(A)** Summary of tdTomato lymphatic reporter mice and LEC-specific *Hif* loss-of-function transgenic mice strains. **(B)** Schematics illustrating the timeline of tamoxifen (TAM)-induced gene modification for lymphedema study.

**Supplemental Figure 4. Negligible spontaneous, tamoxifen-independent, CreERT2-mediated tdTomato induction.**

Whole-mount mouse skin images showing tdTomato fluorescence, which highlights typical mouse tail lymphatic vascular structure in tamoxifen-administered mice, but not in those that did not receive the same treatment. Dashed white lines outline the hexagonal lymphatic capillaries of the tail skin. Scale bar: 100  $\mu$ m.

**Supplemental Figure 5. Prox-1-CreERT2 efficiently mediates LEC *Hif2 $\alpha$*  knockout or overexpression. (A)**

Representative immunofluorescence staining of HIF-2 $\alpha$  (green) and LYVE-1 (red) of skin tissues harvested from control or *Hif2 $\alpha$*  LECKO or *Hif2 $\alpha$*  LECO mice. DAPI (blue) stains nucleus. White arrows point to LYVE-1 expressing lymphatics. **(B)** Quantification of HIF-2 $\alpha$  intensity comparing groups shown in **A** (n=4). Data are presented as mean  $\pm$  SEM; \*P<0.05; \*\*P<0.01; by 1-way ANOVA followed by Tukey's multiple comparison test. n represents numbers of mice. Scale bar: 100  $\mu$ m **(A)**.

**Supplemental Figure 6. Prox-1-CreERT2 efficiently mediates LEC *Hif1 $\alpha$*  knockout. (A)**

Representative immunofluorescence staining of HIF-1 $\alpha$  (green) and LYVE-1 (red) of skin tissues harvested from control or *Hif1 $\alpha$*  LECKO mice. DAPI (blue) stains nucleus. White arrows point to LYVE-1 positive lymphatics. **(B)** Quantification of HIF-1 $\alpha$  intensity comparing groups shown in **A** (n=5). Data are presented as mean  $\pm$  SEM; \*\*P<0.01; by the Mann-Whitney test. n represents numbers of mice. Scale bar: 100  $\mu$ m **(A)**.

**Supplemental Figure 7. Low LEC HIF-1 $\alpha$  expression in lymphedematous skin of *Hif1 $\alpha$***

**LECKO mice. (A)** Representative immunofluorescence staining of HIF-1 $\alpha$  (green) and LYVE-1 (red) of skin tissues harvested from control or *Hif1 $\alpha$*  LECKO mice subjected to lymphatic surgery. DAPI (blue) stains nucleus. White dashed lines demarcate enlarged lymphatics. **(B)** Quantification of HIF-1 $\alpha$  intensity comparing groups shown in **B** (n=5). Data are presented as mean  $\pm$  SEM; \*\*P<0.01; by the Mann-Whitney test. n represents numbers of mice. Scale bar: 60  $\mu$ m **(A)**.

**Supplemental Figure 8. LEC *Hif1 $\alpha$*  deletion modestly aggravates tail volume increase following lymphatic surgery.** Serial tail volume measurements of control and *Hif1 $\alpha$*  LECKO

mice with lymphatic surgery (n=7). Data are presented as mean  $\pm$  SEM; ns, not significant; \*P<0.05; \*\*P<0.01; by the Mann-Whitney test. n represents numbers of mice.

**Supplemental Figure 9. Declined LEC VE-Cadherin expression in the skin of *Hif2 $\alpha$*  LECKO mice subjected to lymphatic surgery compared to that of WT controls. (A)**

Representative immunofluorescence staining of VE-Cadherin (green) and LYVE-1 (red) of skin tissues harvested from WT control or *Hif2 $\alpha$*  LECKO mice subjected to lymphatic surgery. DAPI (blue) stains nucleus. White dashed lines demarcate enlarged lymphatics. (B) Quantification of VE-Cadherin intensity comparing groups shown in B (n=5). Data are presented as mean  $\pm$  SEM; \*P<0.01; by the Mann-Whitney test. n represents numbers of mice. Scale bar: 60  $\mu$ m (A).

**Supplemental Figure 10. Myeloid cell *Hif2 $\alpha$*  deletion causes transient worsening of tail swelling. (A)**

Brief summary of breeding strategy for creating myeloid specific *Hif2 $\alpha$*  knockout by cross LysM-Cre mice with *Hif2 $\alpha$*  (fl/fl) mice. (B) Representative images of WT or myeloid *Hif2 $\alpha$*  KO tail 24 days following sham or lymphatic surgery. (C) Serial tail volume measurement of WT and myeloid *Hif2 $\alpha$*  KO mice with lymphatic surgery (n=7-8). (D) Representative H&E staining of tails of WT or myeloid *Hif2 $\alpha$*  KO mice with lymphatic surgery. Black arrows point to dilated lymphatics, double-headed black arrows illustrate the cutaneous layer thickness. (E) Quantification of cutaneous thickness and lymphatic area comparing groups shown in D (n=5). C and E, data are presented as mean  $\pm$  SEM; ns, not significant; \*P<0.05; the Mann-Whitney test. n represents numbers of mice. Scale bar: 500  $\mu$ m (D).

**Supplemental Figure 11. Prox-1-CreERT2 efficiently mediates LEC *Hif2 $\alpha$*  knockout in the dorsal skin of the embryos. (A)**

Representative whole-mount immunofluorescence images tdTomato (red) and VEGFR3 (green) of skin tissues harvested from control or *Hif2 $\alpha$*  LECKO E16.5 embryos. DAPI (blue) stains nucleus. (B) A schematic diagram showing preparation of tissue sections of E16.5 embryo for immunofluorescence staining. (C) Representative immunofluorescence staining of HIF-2 $\alpha$  (green) and LYVE-1 (red) of dorsal skin of the cervical area from WT control or *Hif2 $\alpha$*  LECKO embryos. DAPI (blue) stains nucleus. White dashed lines demarcate lymphatics. (D) Quantification of HIF-2 $\alpha$  intensity comparing groups shown in C (n=4). Data are presented as mean  $\pm$  SEM; \*P<0.05; by the Mann-Whitney test. n represents numbers of embryos from 3 litters. Scale bars: 200  $\mu$ m (A) and 60  $\mu$ m (C)

**Supplemental Figure 12. LEC *Hif2 $\alpha$*  deficiency causes abnormal tail and tracheal lymphatic remodeling. (A)**

Representative H&E images of control or *Hif2 $\alpha$*  LECKO tail 21 days after tamoxifen administration, black arrows point to lymphatic vessels. (B) Quantification of lymphatic diameter comparing the groups shown in A (n=5). (C) Representative whole mount immunofluorescence staining of LYVE-1 (green) of tracheas from control or *Hif2 $\alpha$*  LECKO mice 21 days after gene deletion. White arrows point to lymphatics sprouting into the cartilaginous area. (D) Quantification of lymphatic diameter comparing the groups shown in C (n=5). B and D, data are presented as mean  $\pm$  SEM; \*P<0.05; \*\*P<0.01; by Mann-Whitney test. n represents numbers of mice. Scale bars: 200  $\mu$ m (A) and 100  $\mu$ m (C).

**Supplemental Figure 13. Decreased LEC TIE2 and p-TIE2 expression in the dorsal skin of E16.5 *Hif2 $\alpha$*  LECKO embryos. (A)**

Representative immunofluorescence staining of TIE2 (green) and LYVE-1 (red) of skin tissues harvested from control or *Hif2 $\alpha$*  LECKO E16.5 embryos. DAPI (blue) stains nucleus. White dashed lines demarcate lymphatics. (B) Quantification of TIE2 intensity comparing groups shown in A (n=5). (C) Representative immunofluorescence staining of p-TIE2 (green) and LYVE-1 (red) of skin tissues harvested from

control or *Hif2α* LECO E16.5 embryos. DAPI (blue) stains nucleus. White dashed lines demarcate lymphatics. (D) Quantification of p-TIE2 intensity comparing groups shown in C (n=5). Data are presented as mean ± SEM; \*P<0.05; \*\*P<0.01; by the Mann-Whitney test. n represents numbers of embryos from 3 litters. Scale bars: 60 μm (A and C).

**Supplemental Figure 14. AdAngpt1, but not AdAngpt2, treatment effectively alleviates lymphedema in WT mice with lymphatic surgery.** (A and B) Serial tail volume measurement of mice subjected to lymphatic surgery treated with AdAngpt1 (A) or AdAngpt2 (B) (n=4-5). Data are presented as mean ± SEM; ns, not significant; \*P<0.05; \*\*P<0.01; by the Mann-Whitney test. n represents numbers of mice.

**Supplemental Figure 15. Sustained LEC HIF-2α expression in the lymphedematous skin of *Hif2α* LECO mice.** (A) Representative immunofluorescence staining of HIF-2α (green) and LYVE-1 (red) of skin tissues harvested from control or *Hif2α* LECO mice subjected to lymphatic surgery. DAPI (blue) stains nucleus. White dashed lines demarcate enlarged lymphatics. (B) Quantification of HIF-2α intensity comparing groups shown in A (n=4). Data are presented as mean ± SEM; \*P<0.05; by the Mann-Whitney test. n represents numbers of mice. Scale bar: 60 μm (A).

**Supplemental Figure 16. Reduced CD45<sup>+</sup> cell infiltration in the lymphedematous skin of *Hif2α* LECO mice.** (A) Representative immunofluorescence staining of CD45 (green) of dermal tissue of control or *Hif2α* LECO mice with lymphatic surgery. DAPI (blue) stains nucleus. (B) Quantification of CD45<sup>+</sup> cells per field comparing groups shown in A (n=5). Data are presented as mean ± SEM; \*\*P<0.01; by the Mann-Whitney test. n represents numbers of mice. Scale bar: 30 μm (A).
